# Supplementary material
Source: ML conference proceedings conference paper supplement (https://proceedings.mlr.press/v108/benedetto20a.html)
Supplement: Supplementary file 1 [file benedetto20a-supp.pdf]

---

# Supplementary material of Non-exchangeable feature allocation models with sublinear growth of the feature sizes

---

**Giuseppe Di Benedetto**  
University of Oxford

**François Caron**  
University of Oxford

**Yee Whye Teh**  
University of Oxford  
DeepMind

In this document we provide the proofs of the Propositions stated in the main paper, together with the posterior predictive distribution of the feature allocations.

## A Posterior predictive distribution of feature allocations

The data augmentation described in Section 5 in the main paper allows us to compute the posterior predictive distribution of the  $n + 1$ -th object given the first  $n$  ones.

$$Z_{n+1} | U_1, \dots, U_n \stackrel{d}{=} Z_{n+1}^* + \sum_{k=1}^{K_n} \tilde{z}_{n+1,k} \delta_{\tilde{\theta}_k}$$

where  $Z_{n+1}^*$  is independent of the  $\tilde{z}_{n+1,k}$  which are distributed as follows

$$\tilde{z}_{n+1,k} | U_1, \dots, U_n \sim \text{Ber} \left( 1 - \frac{\kappa \left( \tilde{m}_{nj}, \Delta_{n+1} + \sum_{i=1}^n \Delta_i \tilde{u}_{ij} 1_{\tilde{\theta}_k \leq Y_i} \right)}{\kappa \left( \tilde{m}_{nj}, \sum_{i=1}^n \Delta_i \tilde{u}_{ij} 1_{\tilde{\theta}_k \leq Y_i} \right)} \right).$$

By the marking theorem for Poisson point processes and Equation (20),  $Z_{n+1}^* = \sum_{k=K_n+1}^{K_n+K_{n+1}^*} \delta_{\tilde{\theta}_k}$  is a Poisson random measure on  $\mathbb{R}_+$  with mean measure  $\mu_{n+1}^*(d\theta) = \int_0^\infty (1 - e^{-\omega \Delta_{n+1} 1_{\theta \leq Y_{n+1}}}) d\nu^*(d\omega, d\theta)$ , where we recall that

$$\begin{aligned} \nu^*(d\omega, d\theta) &= e^{-\omega \sum_{i=1}^n \Delta_i 1_{\theta \leq Y_i}} \rho(\omega) d\omega d\theta \\ &= \left( 1_{\theta > Y_n} + \sum_{i=1}^n e^{-\omega(T_n - T_{i-1})} 1_{Y_{i-1} < \theta \leq Y_i} \right) \times \rho(\omega) d\omega d\theta \end{aligned}$$

where  $T_0 = Y_0 = 0$ . Therefore, the number  $K_{n+1}^* = Z_{n+1}^*(\mathbb{R}_+)$  of new features of the  $n + 1$  object is Poisson

distributed with mean

$$\begin{aligned} \mathbb{E}[Z_{n+1}^*(\mathbb{R}_+)] &= \int_0^\infty \int_0^\infty (1 - e^{-\omega \Delta_{n+1} 1_{\theta \leq Y_{n+1}}}) d\nu^*(d\omega, d\theta) \end{aligned}$$

It follows that

$$\begin{aligned} \mathbb{E}[Z_{n+1}^*(\mathbb{R}_+)] &= \sum_{i=1}^{n+1} (Y_i - Y_{i-1}) \int_0^\infty (1 - e^{-\omega \Delta_{n+1}}) e^{-\omega(T_n - T_{i-1})} \rho(\omega) d\omega \end{aligned} \tag{A.1}$$

The locations  $\tilde{\theta}_{K_n+1}, \dots, \tilde{\theta}_{K_n+K_{n+1}^*}$  are sampled iid from the piecewise constant distribution on  $[0, Y_{n+1}]$  with pdf proportional to

$$\sum_{i=1}^{n+1} 1_{Y_{i-1} < \theta \leq Y_i} \int_0^\infty (1 - e^{-\omega \Delta_{n+1}}) e^{-\omega(T_n - T_{i-1})} \rho(\omega) d\omega \tag{A.2}$$

If  $B$  is a GGP, the integral in Equations (A.1) and (A.2) is tractable and we have

$$\begin{aligned} &\int_0^\infty (1 - e^{-\omega \Delta_{n+1}}) e^{-\omega(T_n - T_{i-1})} \rho(\omega) d\omega \\ &= \begin{cases} \frac{\eta}{\sigma} [(T_{n+1} - T_{i-1} + \zeta)^\sigma - (T_n - T_{i-1} + \zeta)^\sigma] & \sigma > 0 \\ \eta \log \left( 1 + \frac{\Delta_{n+1}}{T_n - T_{i-1} + \zeta} \right) & \sigma = 0 \end{cases} \end{aligned}$$

*Proof.* We have

$$\Pr(\tilde{z}_{n+1,k} = 1 | \tilde{\omega}_k, U_1, \dots, U_n) = 1 - e^{-\tilde{\omega}_k \Delta_{n+1}}$$

and

$$p(\tilde{\omega}_k | U_1, \dots, U_n) = \frac{\tilde{\omega}_k^{\tilde{m}_{n,k}} e^{-\tilde{\omega}_k \sum_{i=1}^n \Delta_i \tilde{u}_{ij} 1_{\tilde{\theta}_k \leq Y_i}} \rho(\tilde{\omega}_k)}{\kappa \left( \tilde{m}_{n,k}, \sum_{i=1}^n \Delta_i \tilde{u}_{ij} 1_{\tilde{\theta}_k \leq Y_i} \right)}$$

Hence

$$\begin{aligned} & \Pr(\tilde{z}_{n+1,k} = 1 \mid U_1, \dots, U_n) \\ &= 1 - \frac{\kappa\left(\tilde{m}_{n,k}, \Delta_{n+1} + \sum_{i=1}^n \Delta_i \tilde{u}_{ij} 1_{\tilde{\theta}_k \leq Y_i}\right)}{\kappa\left(\tilde{m}_{n,k}, \sum_{i=1}^n \Delta_i \tilde{u}_{ij} 1_{\tilde{\theta}_k \leq Y_i}\right)} \end{aligned}$$

□

The conditional distribution of the latent point process  $U_{n+1}$  can be written as follows:

$$\begin{aligned} & p(\tilde{u}_{n+1,k} \mid \tilde{z}_{n+1,k} = 1, \tilde{u}_{1:n,k}) \\ & \propto \kappa\left(\tilde{m}_{n,k} + 1, \Delta_{n+1} \tilde{u}_{n+1,k} + \sum_{i=1}^n \Delta_i \tilde{u}_{ik}\right) 1_{u_{n+1,j} < 1} \end{aligned}$$

*Proof.* We have

$$\begin{aligned} & p(\tilde{u}_{n+1,k} \mid \tilde{\omega}_k, \tilde{z}_{n+1,k} = 1, \tilde{u}_{1:n,k}) \\ &= \frac{\Delta_{n+1} \tilde{\omega}_k e^{-\tilde{u}_{n+1,k} \Delta_{n+1} \tilde{\omega}_k} 1_{\tilde{u}_{n+1,k} < 1}}{1 - e^{-\Delta_{n+1} \tilde{\omega}_k}} \end{aligned}$$

and

$$\begin{aligned} & p(\tilde{\omega}_k \mid \tilde{z}_{n+1,k} = 1, U_1, \dots, U_n) \\ & \propto (1 - e^{-\Delta_{n+1} \tilde{\omega}_k}) \tilde{\omega}_k^{\tilde{m}_{n,k}} e^{-\tilde{\omega}_k \sum_{i=1}^n \Delta_i \tilde{u}_{ij} 1_{\tilde{\theta}_k \leq Y_i}} \rho(\tilde{\omega}_k) \end{aligned}$$

□

## B Proofs

### B.1 Proof of Proposition 1

By the marking theorem for Poisson point processes, the set of points  $\{(\omega_j)_{j \geq 1} \mid z_{ij} = 1\}$  is drawn from a Poisson point process with mean measure  $Y_i(1 - e^{-\Delta_i \omega}) \rho(\omega) d\omega$ . The total number of such points  $Z_i(\mathbb{R}_+)$  is therefore Poisson distributed with mean  $\mathbb{E}[Z_i(\mathbb{R}_+)] = Y_i \psi(\Delta_i)$ . Using integration by part, we have

$$\psi(t) = t \int_0^\infty e^{-wt} \bar{\rho}(w) dw$$

where

$$\bar{\rho}(x) = \int_x^\infty \rho(w) dw. \quad (\text{B.1})$$

Hence, by monotone convergence,

$$\lim_{t \rightarrow \infty} \frac{\psi(t)}{t} = \int_0^\infty \bar{\rho}(w) dw = \kappa(1, 0)$$

and it follows that

$$Y_n \psi(\Delta_n) \stackrel{n \rightarrow \infty}{\sim} Y_n \Delta_n \kappa(1, 0)$$

Finally note that  $\Delta_n \stackrel{n \rightarrow \infty}{\sim} (1 + \xi)^{-1} n^{-\xi/(\xi+1)}$ , hence  $Y_n \Delta_n \rightarrow (1 + \xi)^{-1}$ .

### B.2 Proof of Proposition 2

The number of features observed in the first  $n$  objects can be written as

$$m_n := \sum_{i=1}^n \sum_{j \geq 1} z_{ij} = \sum_{i=1}^n Z_i(\mathbb{R}_+)$$

Since  $\mathbb{E}[Z_n(\mathbb{R}_+)] = \mathbb{E}[m_n] - \mathbb{E}[m_{n-1}]$ , it follows by Stolz-Cesàro theorem that

$$\mathbb{E}[m_n] \stackrel{n \rightarrow \infty}{\sim} (1 + \xi)^{-1} \kappa(1, 0) n.$$

In order to get the almost sure convergence of  $m_n$  to its expectation we can use the Kolmogorov strong law of large numbers which, under the assumption  $\sum_{n \geq 1} \text{Var}\left(\frac{Z_n(\mathbb{R}_+)}{n}\right) < \infty$ , gives

$$\frac{m_n - \mathbb{E}[m_n]}{n} \rightarrow 0 \text{ almost surely.}$$

Recall that  $\text{Var}(Z_n(\mathbb{R}_+)) = \mathbb{E}[Z_n(\mathbb{R}_+)]$ . Therefore the summability condition on the variance boils down to the convergence of the sum  $\sum_{n \geq 1} \frac{1}{n^2} Y_n \psi(\Delta_n)$ , which holds true since the elements of the sum are of order  $n^{-2}$ .

### B.3 Proof of Proposition 3

Since  $\mathbb{E}[m_{n,j} | B] = \sum_{i=1}^n (1 - e^{-\omega_j \Delta_i}) 1_{\theta_j < Y_i}$ , we have  $\frac{\mathbb{E}[m_{n,j} | B] - \mathbb{E}[m_{n-1,j} | B]}{T_n - T_{n-1}} = \frac{1 - e^{-\omega_j \Delta_n}}{\Delta_n} 1_{\theta_j < Y_n} \rightarrow \omega_j$ , then by Stolz-Cesàro theorem we have that

$$\mathbb{E}[m_{n,j} | B] \stackrel{n \rightarrow \infty}{\sim} \omega_j T_n.$$

We have

$$\begin{aligned} \text{Var}(m_{n,j} | B) &= \sum_{i=1}^n (1 - e^{-\omega_j \Delta_i}) e^{-\omega_j \Delta_i} 1_{\theta_j < Y_i} \\ &\leq \mathbb{E}[m_{n,j} | B]. \end{aligned}$$

Using the sandwiching argument in Proposition 2 of Gnedin et al. (2007) it follows that, conditionally on  $B$ ,  $\frac{m_{n,j}}{\mathbb{E}[m_{n,j} | B]} \rightarrow 1$  almost surely.

### B.4 Proof of Proposition 4

Applying Campbell's theorem

$$\begin{aligned} \mathbb{E}[K_n] &= \mathbb{E}[\mathbb{E}[K_n | B]] \\ &= \mathbb{E}\left[\sum_j \Pr(m_{n,j} > 0 | B)\right] \\ &= \int_0^\infty \int_0^\infty (1 - e^{-\omega f_n(\theta)}) \rho(\omega) d\omega d\theta \\ &= \int_0^{Y_n} \psi(T_n - g(\theta)) d\theta \end{aligned}$$

where

$$f_n(\theta) := \sum_{i=1}^n \Delta_i 1_{\theta \leq Y_i} = (T_n - g(\theta)) 1_{\theta \leq Y_n} \quad (\text{B.2})$$

with  $g(\theta) := \sum_{i=1}^{\infty} \Delta_i 1_{\theta > Y_i}$  is a monotone increasing step function satisfying, for all  $\theta \geq 0$

$$\max(0, g_1(\theta)) \leq g(\theta) \leq g_2(\theta) \quad (\text{B.3})$$

where  $g_1(\theta) = (\theta^{(\xi+1)/\xi} - 1)^{1/(\xi+1)}$  and  $g_2(\theta) = \theta^{1/\xi}$ . Note that  $g_1(\theta) \stackrel{\theta \rightarrow \infty}{\sim} g_2(\theta) \stackrel{\theta \rightarrow \infty}{\sim} \theta^{1/\xi}$ . As  $\psi$  is an increasing function, it follows

$$\int_0^{Y_n} \psi(T_n - g_2(\theta)) d\theta \leq \mathbb{E}[K_n] \leq \int_1^{Y_n} \psi(T_n - g_1(\theta)) d\theta + \psi(T_n).$$

Using a change of variable, we obtain

$$\int_0^{Y_n} \psi(T_n - g_2(\theta)) d\theta = \xi \int_0^{T_n} \psi(T_n - \theta) \theta^{\xi-1} d\theta$$

Finally, noting that

$$\psi(t) \stackrel{t \rightarrow \infty}{\sim} t^\sigma \ell(t)$$

where

$$\ell(t) = \begin{cases} \eta \log(t) & \sigma = 0 \\ \frac{\eta}{\sigma} & \sigma \in (0, 1) \end{cases}$$

and using (Di Benedetto et al., 2017, Lemma 14), we obtain

$$\int_0^{Y_n} \psi(T_n - g_2(\theta)) d\theta \stackrel{n \rightarrow \infty}{\sim} \frac{\Gamma(\xi+1)\Gamma(\sigma+1)}{\Gamma(\sigma+\xi+1)} n^{\frac{\xi+\sigma}{\xi+1}} \ell(n)$$

Similarly, we have

$$\int_1^{Y_n} \psi(T_n - g_1(\theta)) d\theta \stackrel{n \rightarrow \infty}{\sim} \frac{\Gamma(\xi+1)\Gamma(\sigma+1)}{\Gamma(\sigma+\xi+1)} n^{\frac{\xi+\sigma}{\xi+1}} \ell(n).$$

It follows by sandwiching that

$$\mathbb{E}[K_n] \stackrel{n \rightarrow \infty}{\sim} \frac{\Gamma(\xi+1)\Gamma(\sigma+1)}{\Gamma(\sigma+\xi+1)} n^{\frac{\xi+\sigma}{\xi+1}} \ell(n).$$

Using Campbell's theorem again,

$$\begin{aligned} \text{Var}[K_n] &= \text{Var}[\mathbb{E}[K_n | B]] + \mathbb{E}[\text{Var}[K_n | B]] \\ &= \int \left(1 - e^{-\omega f_n(\theta)}\right) e^{-\omega f_n(\theta)} \rho(d\omega) d\omega d\theta \\ &\quad + \int \left(1 - e^{-\omega f_n(\theta)}\right)^2 \rho(d\omega) d\omega d\theta \\ &= \int \left(1 - e^{-\omega f_n(\theta)}\right) \rho(d\omega) d\omega d\theta \end{aligned}$$

therefore the almost sure asymptotic equivalence follows by Chebyshev inequality and the strong law of large numbers for  $K_n$  (see (Gnedin et al., 2007, Proposition 2)).

## B.5 Proof of Proposition 5

We have the following inequality, for any  $x \geq 0$

$$0 \leq x - (1 - e^{-x}) \leq \frac{x^2}{2}. \quad (\text{B.4})$$

Let us recall that

$$K_{n,r} = \sum_{j \geq 1} 1_{m_{n,j}=r}.$$

where  $m_{n,j} = \sum_{i=1}^n z_{ij}$ . Conditional on the CRM  $B$  we have

$$\mathbb{E}[K_{n,r} | B] = \sum_{j \geq 1} \Pr(m_{n,j} = r | B).$$

Note that  $\Pr(m_{n,j} = r | B)$  only depends on  $(\theta_j, \omega_j)$ .

Write  $S_{n,r}(\theta_j, \omega_j) = \Pr(m_{n,j} = r | B)$ . Let us denote  $q_i(\theta_j, \omega_j) := \Pr(z_{ij} = 1 | B) = 1 - e^{-\Delta_i \omega_j 1_{\theta_j \leq Y_i}}$ ;  $\lambda_n(\theta_j, \omega_j) := \sum_{i=1}^n q_i(\theta_j, \omega_j)$ . Conditional on  $B$  the random variable  $m_{n,j}$  has a Poisson-Binomial distribution with parameters  $(q_1(\theta_j, \omega_j), \dots, q_n(\theta_j, \omega_j))$ . For each fixed  $(\omega_j, \theta_j)$  Le Cam's inequality Le Cam (1960) and inequality (B.4) give

$$\begin{aligned} &\sum_{r \geq 0} \left| \Pr(m_{n,j} = r | B) - \text{Poisson}(r; \lambda_n(\theta_j, \omega_j)) \right| \\ &\leq 2 \sum_{i=1}^n q_i(\theta_j, \omega_j)^2 \leq 2\omega_j^2 \sum_{i=1}^n \Delta_i^2 1_{\theta_j \leq Y_i}. \end{aligned} \quad (\text{B.5})$$

where  $\text{Poisson}(r; \lambda)$  denote the probability mass function of a Poisson random variable with rate parameter  $\lambda$  evaluated at  $r$ . Note that for any  $0 < \lambda_1 \leq \lambda_2$ , using coupling inequalities (see. e.g. (Roch, 2015, Example 4.10 p. 154))

$$\sum_{r \geq 0} \left| \text{Poisson}(r; \lambda_1) - \text{Poisson}(r; \lambda_2) \right| \leq 2(\lambda_2 - \lambda_1).$$

Noting that  $\lambda_n(\theta_j, \omega_j) \leq \omega_j f_n(\theta_j)$ , where  $f_n$  is defined in Equation (B.2), and using inequality (B.4), we obtain

$$\begin{aligned} &\sum_{r \geq 0} \left| \text{Poisson}(r; \lambda_n(\theta_j, \omega_j)) - \text{Poisson}(r; \omega_j f_n(\theta_j)) \right| \\ &\leq 2 \sum_{i=1}^n (\omega_j \Delta_i - (1 - e^{-\omega_j \Delta_i})) 1_{\theta_j \leq Y_i} \\ &\leq \omega_j^2 \sum_{i=1}^n \Delta_i^2 1_{\theta_j \leq Y_i} \end{aligned}$$

Combining the above inequality with the inequality (B.5), we obtain the total variation bound

$$\begin{aligned} & \sum_{r \geq 0} \left| \Pr(m_{n,j} = r \mid B) - \text{Poisson}(r; \omega_j f_n(\theta_j)) \right| \\ & \leq 3\omega_j^2 \sum_{i=1}^n \Delta_i^2 \mathbf{1}_{\theta_j \leq Y_i}. \end{aligned} \quad (\text{B.6})$$

Using Campbell's theorem,

$$\begin{aligned} \mathbb{E} \left[ \sum_{j \geq 1} \omega_j^2 \sum_{i=1}^n \Delta_i^2 \mathbf{1}_{\theta_j \leq Y_i} \right] &= \kappa(2, 0) \sum_{i=1}^n Y_i \Delta_i^2 \\ &\underset{n \rightarrow \infty}{\sim} n^{1/(1+\xi)}. \end{aligned} \quad (\text{B.7})$$

Using Campbell's theorem again,

$$\begin{aligned} & \mathbb{E} \left[ \sum_{j \geq 1} \text{Poisson}(r; \omega_j f_n(\theta_j)) \right] \\ &= \frac{1}{r!} \int_0^\infty \int_0^\infty e^{-\omega f_n(\theta)} \omega^r f_n(\theta)^r \rho(\omega) d\omega d\theta \\ &= \frac{1}{r!} \int_0^\infty \kappa(r, f_n(\theta)) f_n(\theta)^r d\theta \\ &= \frac{1}{r!} \int_0^{Y_n} \kappa(r, T_n - g(\theta)) (T_n - g(\theta))^r d\theta \end{aligned}$$

We use again the inequality (B.3) to bound the above expression. The upper bound is given by

$$\frac{1}{r!} \int_0^{Y_n} \kappa(r, T_n - g_2(\theta)) (T_n - g_1(\theta))^r d\theta$$

Using a change of variable, we obtain

$$\begin{aligned} & \frac{\xi}{r!} \int_0^{T_n} \kappa(r, T_n - \theta) (T_n - g_1(\theta^\xi))^r \theta^{\xi-1} d\theta \\ &= \frac{\xi}{r!} \int_0^{T_n} \kappa(r, \theta) (g_1(\theta^\xi))^r (T_n - \theta)^{\xi-1} d\theta. \end{aligned} \quad (\text{B.8})$$

Noting that  $\kappa(r, \theta) \stackrel{\theta \rightarrow \infty}{\sim} \eta \theta^{\sigma-r} \frac{\Gamma(r-\sigma)}{\Gamma(1-\sigma)}$  and  $(g_1(\theta^\xi))^r \stackrel{\theta \rightarrow \infty}{\sim} \theta^r$ , and using (Di Benedetto et al., 2017, Lemma 14), we obtain that (B.8) is asymptotically equivalent to

$$\eta \frac{\Gamma(\xi+1)\Gamma(r-\sigma)}{r!\Gamma(\sigma+\xi+1)} n^{\frac{\xi+\sigma}{\xi+1}}.$$

A similar asymptotic equivalence is obtained for the lower bound, and we conclude by sandwiching that

$$\begin{aligned} & \mathbb{E} \left[ \sum_{j \geq 1} \text{Poisson}(r; \omega_j f_n(\theta_j)) \right] \\ & \stackrel{n \rightarrow \infty}{\sim} \eta \frac{\Gamma(\xi+1)\Gamma(r-\sigma)}{r!\Gamma(\sigma+\xi+1)} n^{\frac{\xi+\sigma}{\xi+1}} \end{aligned}$$

Combining the above asymptotic result with Equations (B.6) and (B.7), and assuming  $\xi + \sigma > 1$ , we conclude

$$\begin{aligned} \mathbb{E}[K_{n,r}] &= \mathbb{E} \left[ \sum_{j \geq 1} \Pr(m_{n,j} = r \mid B) \right] \\ &\stackrel{n \rightarrow \infty}{\sim} \eta \frac{\Gamma(\xi+1)\Gamma(r-\sigma)}{r!\Gamma(\sigma+\xi+1)} n^{\frac{\xi+\sigma}{\xi+1}}. \end{aligned}$$

The variance of  $K_{n,r}$  can be written as

$$\begin{aligned} \text{Var}[K_{n,r}] &= \text{Var}[\mathbb{E}[K_{n,r} \mid B]] + \mathbb{E}[\text{Var}[K_{n,r} \mid B]] \\ &= \int S_{n,r}(\theta, \omega) \rho(\omega) d\omega d\theta \\ &+ \int S_{n,r}(\theta, \omega) (1 - S_{n,r}(\theta, \omega)) \rho(\omega) d\omega d\theta \\ &= \mathbb{E}[K_{n,r}]. \end{aligned}$$

Using the result below Proposition 2 in Gneden et al. (2007), we obtain, almost surely,  $\mathbb{E} \left[ \sum_{r \geq j} K_{n,r} \right] \stackrel{n \rightarrow \infty}{\sim} \sum_{r \geq j} K_{n,r}$ . Using a proof similar to that of Corollary 21 in Gneden et al. (2007), we obtain

$$K_{n,r} \stackrel{n \rightarrow \infty}{\sim} \eta \frac{\Gamma(\xi+1)\Gamma(r-\sigma)}{r!\Gamma(\sigma+\xi+1)} n^{\frac{\xi+\sigma}{\xi+1}}. \quad (\text{B.9})$$

Combining Equation (B.9) with Equation (17) gives the final result.

## References

- Di Benedetto, G., Caron, F., and Teh, Y. W. (2017). Non-exchangeable random partition models for microclustering. *arXiv preprint arXiv:1711.07287*.
- Gneden, A., Hansen, B., and Pitman, J. (2007). Notes on the occupancy problem with infinitely many boxes: general asymptotics and power laws. *Probab. Surv.* 4(146-171):88.
- Le Cam, L. (1960). An approximation theorem for the Poisson binomial distribution. *Pacific Journal of Mathematics*, 10(4):1181-1197.
- Roch, S. (2015). Modern discrete probability: An essential toolkit. chapter 4. <https://www.math.wisc.edu/~roch/mdp/roch-mdp-chap4.pdf>.
